# Supplementary material for: Surface Chemistry, Crystal Structure, Size and Topography Role in the Albumin Adsorption Process on TiO2 Anatase Crystallographic Faces and Its 3D-Nanocrystal: A Molecular Dynamics Study
Source: MDPI journal article supplement (doi:10.3390/coatings11040420), 2021-04-04
Supplement: s1 [file s1]

Supplementary

# Surface Chemistry, Crystal Structure, Size and Topography Role in the Albumin Adsorption Process on TiO<sub>2</sub> Anatase Crystallographic Faces and Its 3D-Nanocrystal: A Molecular Dynamics Study <sup>†</sup>

Giuseppina Raffaini <sup>1,2</sup>

<sup>1</sup> Department of Chemistry, Materials, and Chemical Engineering “Giulio Natta”, Politecnico di Milano, Piazza L. Da Vinci 32, 20131 Milano, Italy; giuseppina.raffaini@polimi.it

<sup>2</sup> INSTM, National Consortium of Materials Science and Technology, Local Unit Politecnico di Milano, 20131 Milano, Italy

<sup>†</sup> Dedicated to the memory of my father Mario Tancredi Raffaini

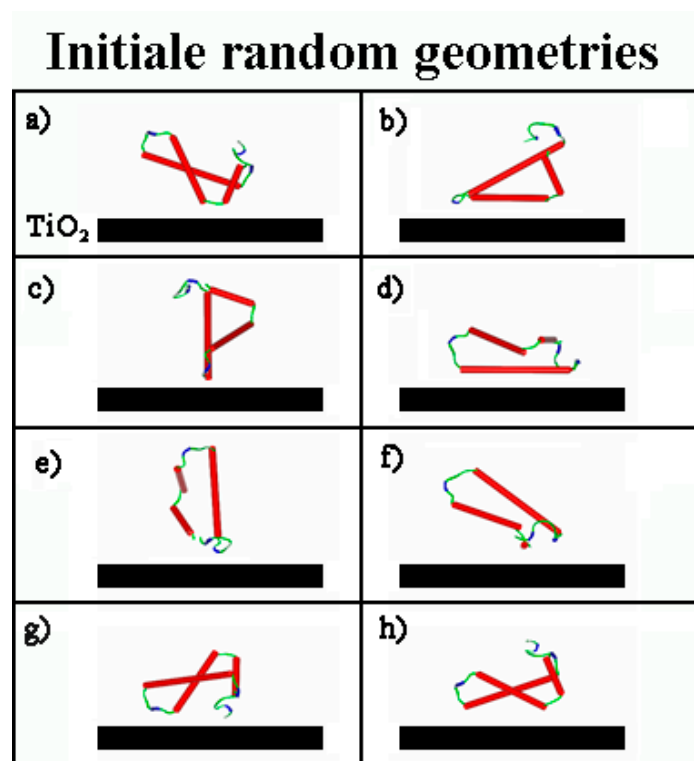

**Figure S1.** Scheme of the eight different initial *non-optimized* geometries studied in the Section 3.1.1, considering the three  $\alpha$ -helices of the HSA A-subdomain considered near the TiO<sub>2</sub> anatase surface, using a simulation protocol proposed in previous work [1].

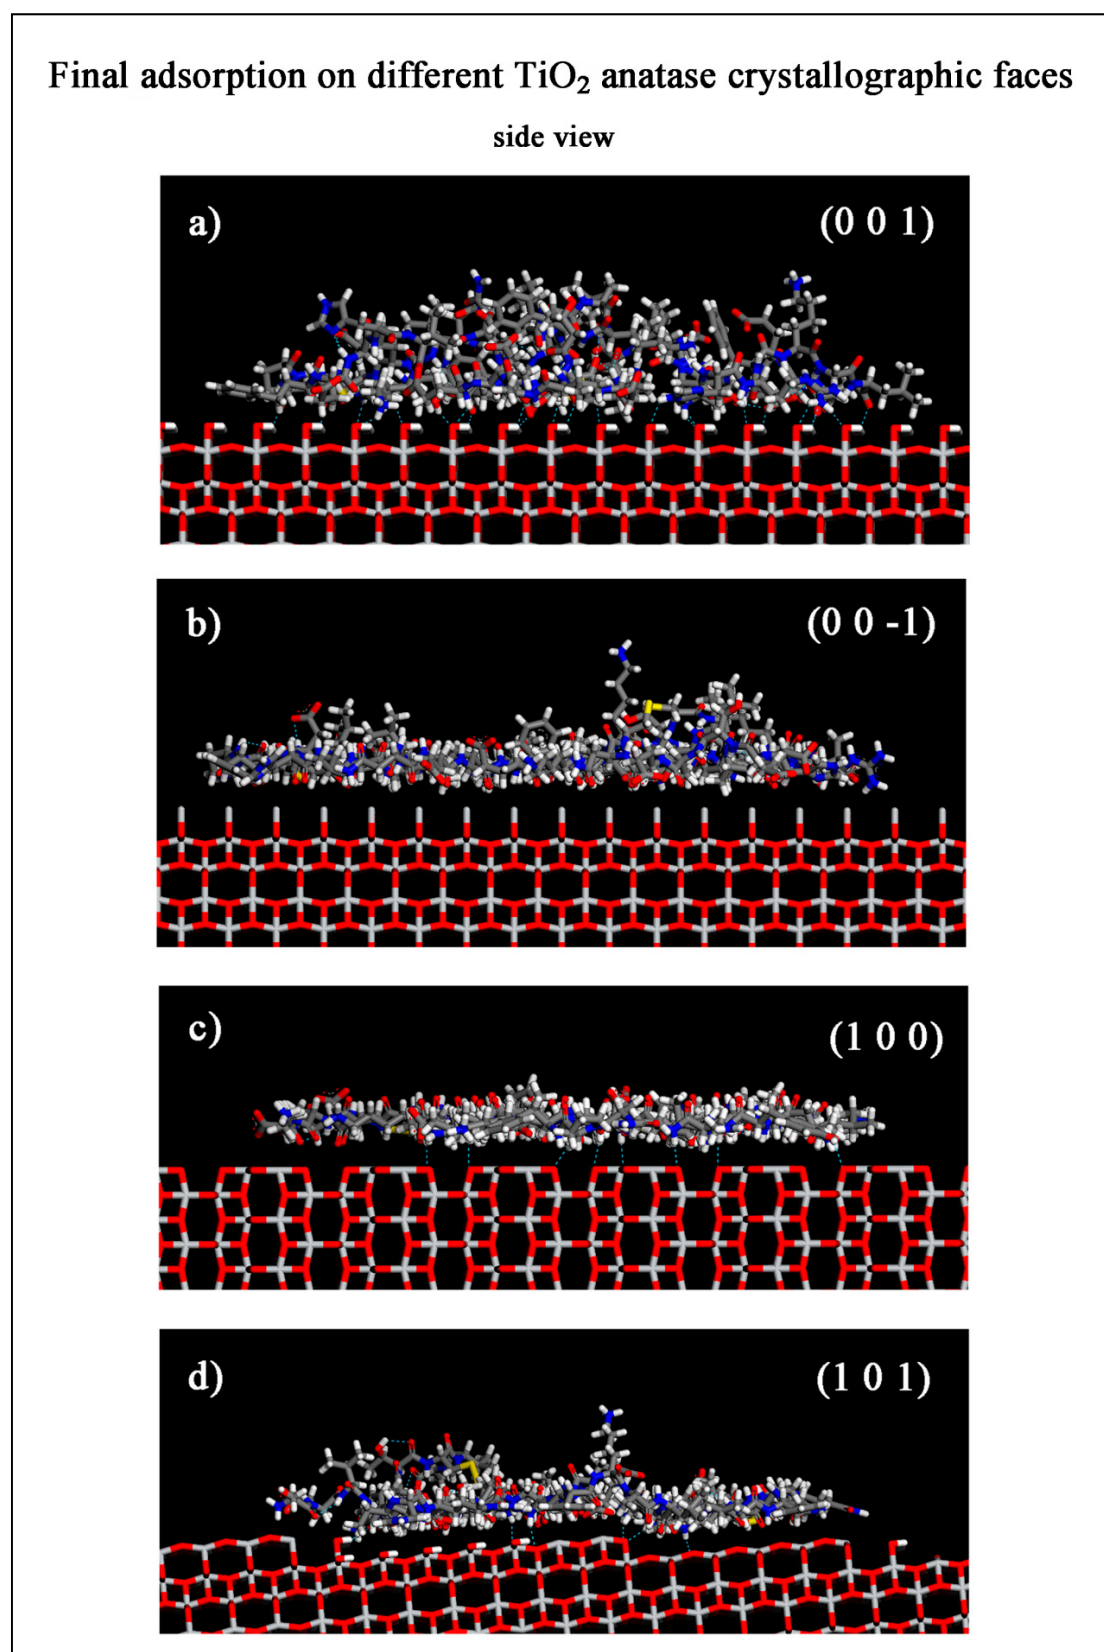

**Figure S2.** The Albumin A-subdomain in the final adsorption stage on the four different TiO<sub>2</sub> crystallographic faces reported in Figure 5, displaying the H-bonds between the protein fragment and the solid surface.

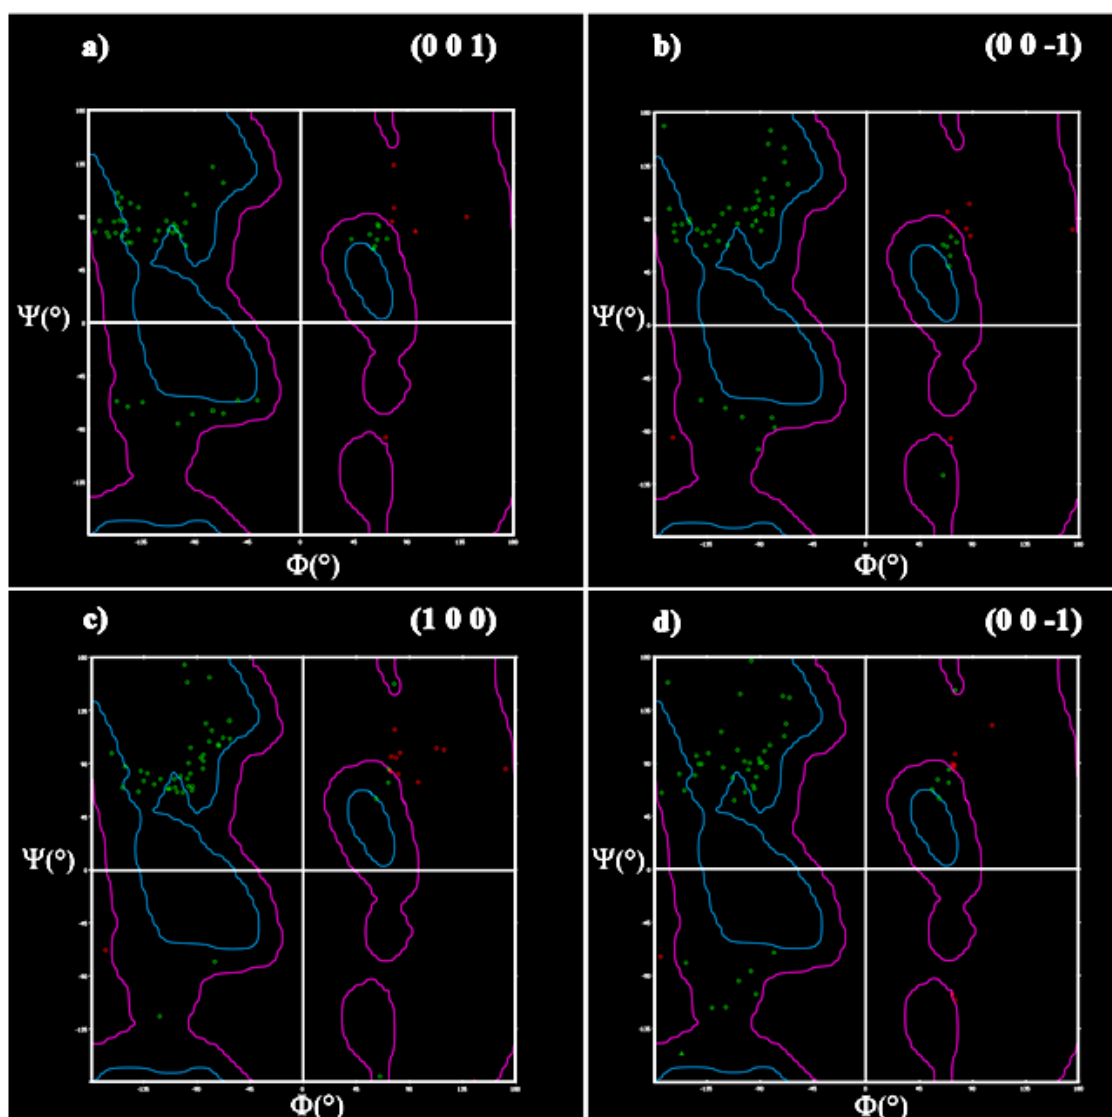

**Figure S3.** The Ramachandran Plot of the albumin A-subdomain in the final adsorption stage on the four different  $\text{TiO}_2$  crystallographic faces reported in Figure 5.

## Reference

1. Raffaini, G.; Ganazzoli, F. Simulation study of the interaction of some albumin subdomains with a flat graphite surface. *Langmuir* **2003**, *19*, 3403–3412, doi:10.1021/la026853h.
